# Supplementary material for: Severe traumatic injury is associated with profound changes in DNA methylation
Source: PubMed Central journal article supplement — NPJ Genom Med. 2024 Nov 1;9:53. doi: 10.1038/s41525-024-00438-4 (PMC11530621; doi:10.1038/s41525-024-00438-4), 2024-11-01
Supplement: 41525_2024_438_MOESM1_ESM.pdf [file 41525_2024_438_MOESM1_ESM.pdf]

**Supplementary table 1: List of genes related to the top 20 differentially methylated regions (DMRs) in the analysis of the DNA methylation profile of patients pre-trauma vs. post-trauma (analysis 1).**

| Gene ID(s) | Gene name(s)                                                                 | hg19 genomic coordinates  | No. of CpGs | Percent mean methylation difference | q-value (HMFDR)         |
|------------|------------------------------------------------------------------------------|---------------------------|-------------|-------------------------------------|-------------------------|
| METTL5     | Methyltransferase 5                                                          | Chr2: 170677497-170677752 | 2           | -10.1                               | 4.44 x 10 <sup>-7</sup> |
| MNAT1      | MNAT1 component of CDK activating kinase                                     | Chr14: 61410604-61411138  | 2           | -11.5                               | 1.48 x 10 <sup>-6</sup> |
| TTL1       | TTL family tubulin polyglutamylase complex subunit L1                        | Chr22: 43484984-43485702  | 13          | 0.2                                 | 2.88 x 10 <sup>-6</sup> |
| TSEN2      | tRNA splicing endonuclease subunit 2                                         | Chr3: 12571276-12571675   | 4           | -3.9                                | 2.96 x 10 <sup>-6</sup> |
| YAE1D1     | YAE1 Maturation Factor Of ABCE1                                              | Chr7: 39609343-39609707   | 2           | -10.1                               | 3.12 x 10 <sup>-6</sup> |
| LYRM5      | Electron Transfer Flavoprotein Regulatory Factor 1                           | Chr12: 25347663-25348826  | 18          | 0.4                                 | 3.99 x 10 <sup>-6</sup> |
| CASC1      | Cancer Susceptibility Candidate 1                                            |                           |             |                                     |                         |
| RSU1       | Ras suppressor protein 1                                                     | Chr10: 16859107-16860140  | 14          | 1.2                                 | 8.10 x 10 <sup>-6</sup> |
| SSBP4      | Single Stranded DNA Binding Protein 4                                        | Chr19: 18543829-18544419  | 3           | 6.6                                 | 1.29 x 10 <sup>-5</sup> |
| ACER2      | Alkaline Ceramidase 2                                                        | Chr9: 19408584-19409652   | 10          | 1.3                                 | 1.38 x 10 <sup>-5</sup> |
| KLC4       | Kinesin Light Chain 4                                                        | Chr6: 43025862-43026774   | 2           | -8.7                                | 1.89 x 10 <sup>-5</sup> |
| MRPL2      | Mitochondrial ribosomal protein L2                                           |                           |             |                                     |                         |
| NR2F2      | Nuclear receptor subfamily 2 group F member 2                                | Chr15: 96875104-96876265  | 12          | 1.3                                 | 2.00 x 10 <sup>-5</sup> |
| RNF216P1   | Ring Finger Protein 216 Pseudogene 1                                         | Chr7: 5014008-5014435     | 3           | 3.6                                 | 2.21 x 10 <sup>-5</sup> |
| NIFKP2     | Nucleolar protein interacting with the FHA domain of MKI67 pseudogene 2      | Chr5: 174350112-174350186 | 2           | -6.2                                | 2.27 x 10 <sup>-5</sup> |
| RPS15      | Ribosomal Protein S15                                                        | Chr19: 1438017-1439250    | 15          | -0.5                                | 2.34 x 10 <sup>-5</sup> |
| SNORD88B   | Small Nucleolar RNA, C/D Box 88B                                             | Chr19: 51302371-51303252  | 6           | -0.9                                | 2.59 x 10 <sup>-5</sup> |
| SNORD88A   | small nucleolar RNA, C/D box 88A                                             |                           |             |                                     |                         |
| YWHAQ      | Tyrosine 3-monooxygenase/tryptophan 5-monooxygenase activation protein theta | Chr2: 9770130-9771081     | 6           | 0.8                                 | 2.66 x 10 <sup>-5</sup> |
| ACTN1      | Actinin alpha 1                                                              | Chr14: 69356700-69356891  | 2           | -5.6                                | 3.05 x 10 <sup>-5</sup> |
| HERC2      | HECT and RLD domain containing E3 ubiquitin protein ligase 2                 | Chr15: 28380110-28380456  | 2           | -9.1                                | 3.34 x 10 <sup>-5</sup> |
| KRT19      | Keratin 19                                                                   | Chr17: 39684038-39684825  | 6           | 2.6                                 | 3.38 x 10 <sup>-5</sup> |
| SPDYE4     | Speedy/RINGO Cell Cycle Regulator Family Member E4                           | Chr17: 8661813- 8662302   | 7           | -2.4                                | 3.48 x 10 <sup>-5</sup> |
